# Supplementary material for: Synthesis of multivalent aminoglycoside mimics via the Ugi multicomponent reaction
Source: Royal Society of Chemistry journal article supplement (doi:10.1039/b501028d), 2005-01-01
Supplement: b501028d.pdf [file b501028d.pdf]

# Supporting Information

**Synthesis of Multivalent Aminoglycoside Mimics via the Ugi Multicomponent Reaction**

**Bernhard Westermann,\* and Simon Dörner**

Leibniz Institute of Plant Biochemistry, Department of Bioorganic Chemistry, Weinberg 3, 06120 Halle (Saale), Germany. Fax: 49 345 5582 1309; Tel: 49 345 5582 1340; E-mail: [bwesterm@ipb-halle.de](mailto:bwesterm@ipb-halle.de)

**12,13-Di-*O*-acetyl-*N*-(7-[[1-(benzyloxy)-1-oxohexyl]amino]-8,8-dimethyl-7-oxoethyl)-11,15-dideoxy-11,15-bis[(trifluoroacetyl)amino]-*N*-{19-[(trifluoroacetyl)amino]butanoyl}- $\beta$ -D-glucopyranosylamin (16)**

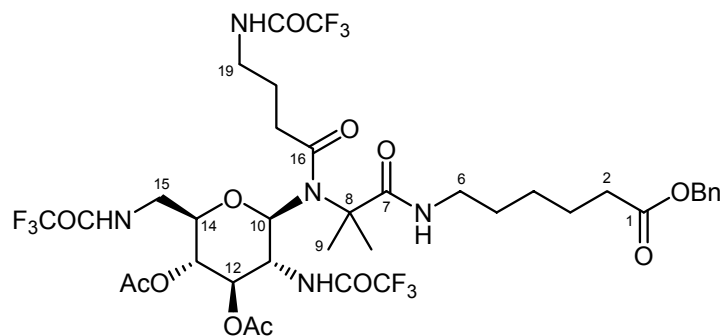

**<sup>1</sup>H-NMR** (500 MHz, CDCl<sub>3</sub>):  $\delta$  [ppm] = 1.21–1.29 (m, 2H, 4-H), 1.33–1.36 (m, 8H, 5-H, 9-H), 1.51–1.60 (m, 2H, 3-H), 1.68–1.77 (m, 2H, 18-H), 1.88 (s, 3H, CH<sub>3(Ac)</sub>), 2.03 (s, 3H, CH<sub>3(Ac)</sub>), 2.26–2.32 (t,  $J$  = 7.4 Hz, 2H, 2-H), 2.54–2.62 (m, 2H, 17-H), 3.00–3.17 (m, 3H, 15-H<sup>a</sup>, 6-H), 3.22–3.38 (m, 2H, 19-H), 3.66–3.73 (m, 1H, 14-H), 3.76–3.86 (m, 1H, 15-H<sup>b</sup>), 4.64–4.72 (m, 1H, 11-H), 4.85–4.91 (pt,  $J$  = 9.8 Hz, 1H, 13-H), 4.91–4.96 (d,  $J$  = 10.0 Hz, 1H, 10-H), 5.02–5.05 (s, 2H, CH<sub>2</sub> benzyl.), 5.36–5.43 (pt,  $J$  = 9.6 Hz, 1H, 12-H), 5.94–6.00 (bs, 1H, 1'-NH), 7.22–7.31 (m, 5H, CH arom.), 7.36–7.42 (bs, 1H, 19-NH), 7.76–7.84 (bs, 1H, 15-NH), 7.90–7.99 (bs, 1H, 11-NH); **<sup>13</sup>C-NMR** (125 MHz, CDCl<sub>3</sub>):  $\delta$  [ppm] = 20.31, 20.50 (q, CH<sub>3(Ac)</sub>), 24.09 (t, C-18), 24.41 (t, C-3), 25.41, 25.60 (q, C-9), 26.18 (t, C-4), 28.76 (t, C-5), 33.73 (t, C-17), 34.07 (t, C-2), 39.28 (t, C-19), 39.65 (t, C-6), 39.97 (t, C-15), 53.17 (d, C-11), 66.21 (t, CH<sub>2</sub> benzyl.), 69.58 (d, C-13), 72.32 (d, C-12), 74.32 (d, C-14), 83.05 (d, C-10), 115.50 (m, CF<sub>3</sub>), 128.07, 128.22, 128.56 (d, CH arom.), 136.00 (s, C arom.), 158.25 (m, C(O)CF<sub>3</sub>), 170.28, 170.85, 173.72, 174.74, 175.43 (s, CO); **HRMS (ESI)** calcd for C<sub>37</sub>H<sub>46</sub>F<sub>9</sub>N<sub>5</sub>O<sub>12</sub>Na [M+Na<sup>+</sup>]: 946.2891, found: 946.2875

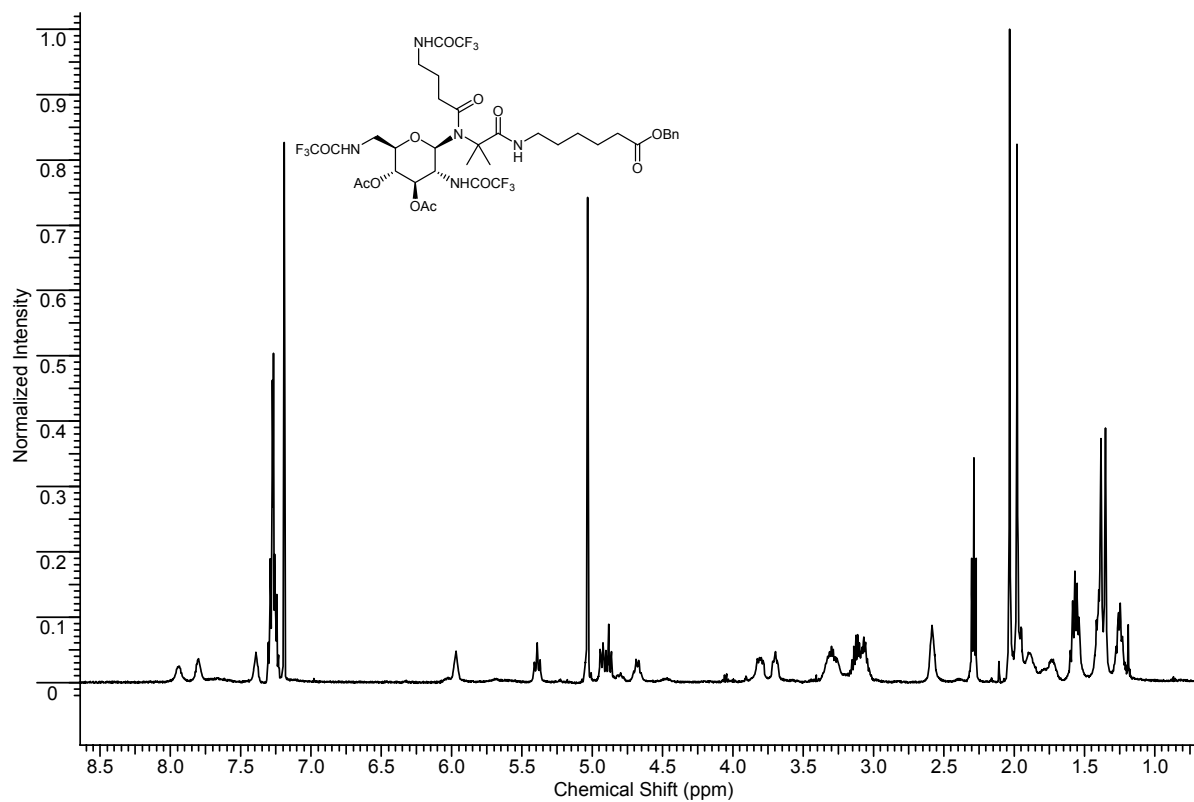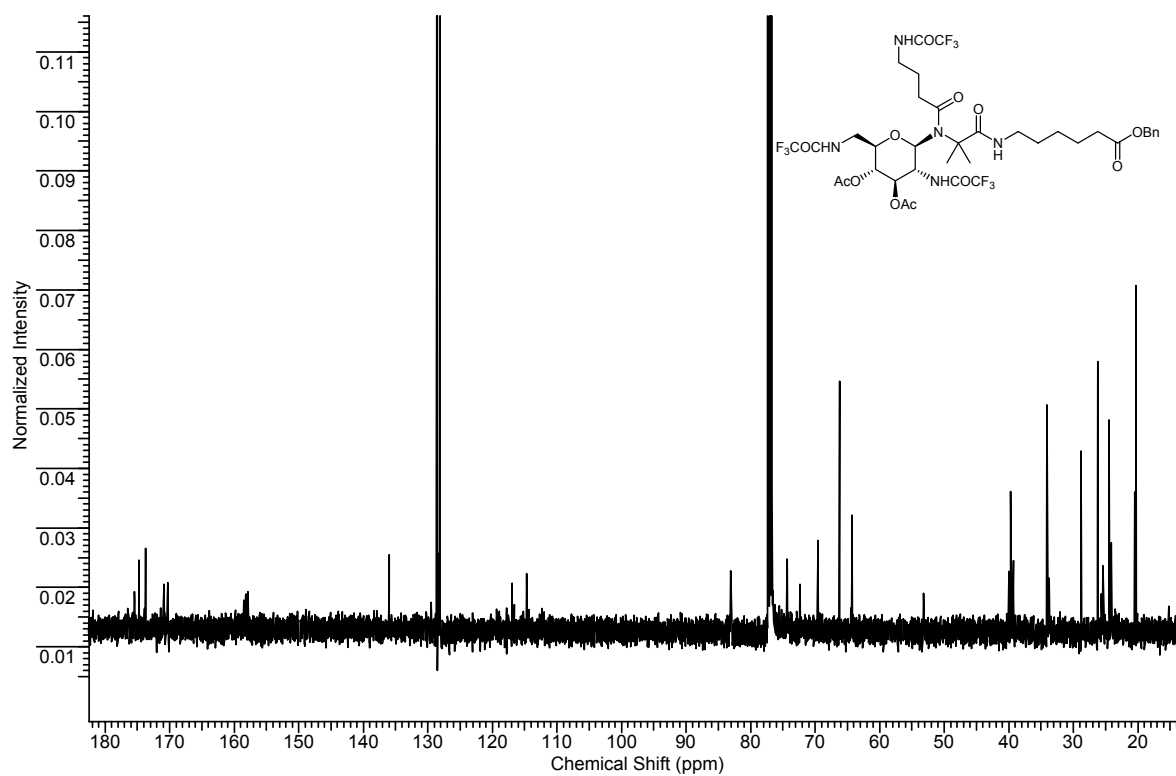

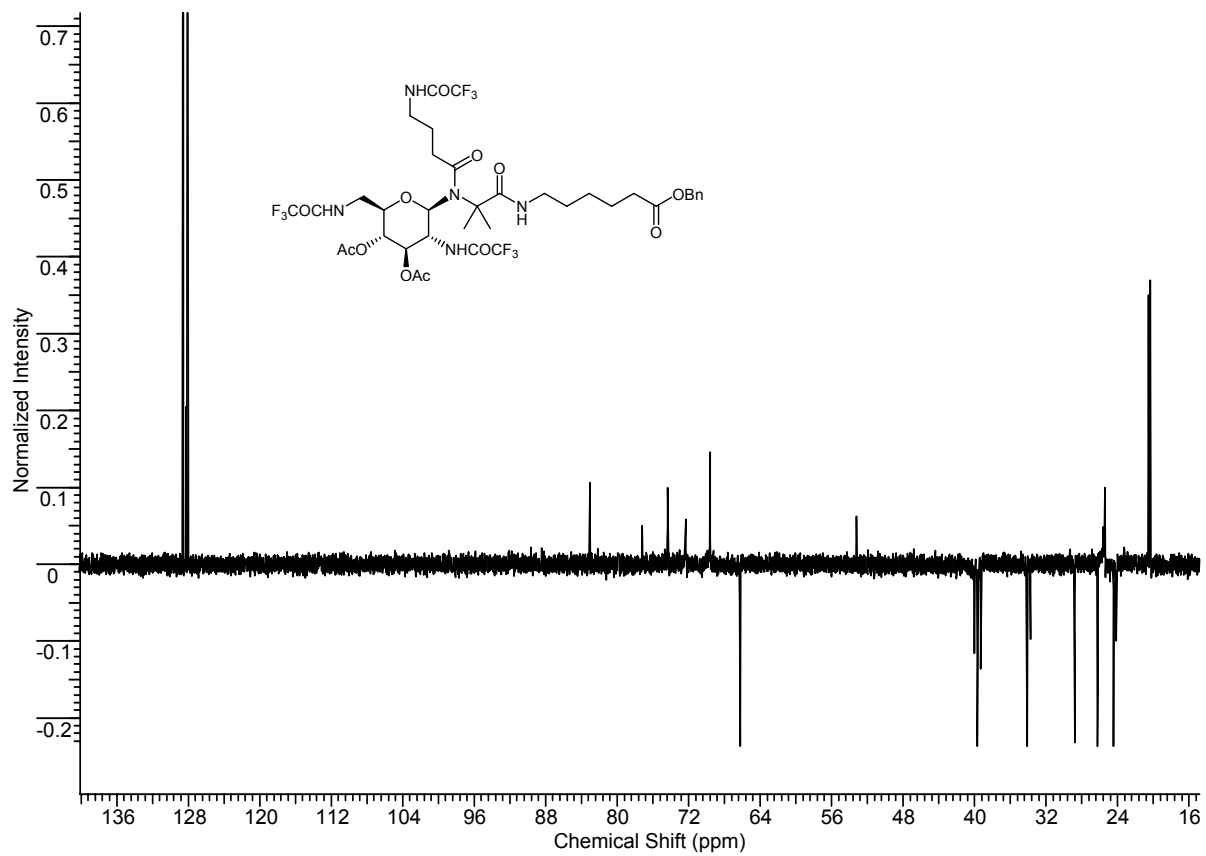

2,3,4,6-Tetra-*O*-acetyl-*N*-(2-{{6-(benzyloxy)-6-oxohexyl}amino}-1,1-dimethyl-2-oxoethyl)-*N*-{[(2,3,4,6-tetra-*O*-acetyl- $\beta$ -D-glucopyranosyl)oxy]acetyl}- $\beta$ -D-glucopyranosylamine (17)

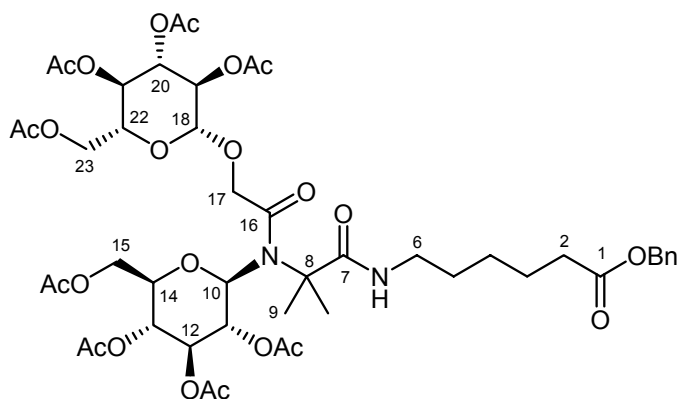

<sup>1</sup>H-NMR (200 MHz, CDCl<sub>3</sub>):  $\delta$  [ppm] = 1.25–1.72 (m, 12H), 1.96, 1.98, 2.00, 2.01, 2.02, 2.04, 2.06, 2.07 (s, 3H), 2.33 (t,  $J$  = 7.3 Hz, 2H), 3.04–3.22 (m, 2H), 3.66–3.88 (m, 2H), 4.11–5.91 (m, 17H), 7.31 (s, 5H); <sup>13</sup>C-NMR (50 MHz, CDCl<sub>3</sub>):  $\delta$  [ppm] = 20.92, 21.02, 21.09, 21.14, 21.28, 21.46 (q, CH<sub>3(Ac)</sub>), 24.87 (t, C-3), 25.22 (q, C-9), 26.71, 29.53, 34.46, 39.92 (t, C-2, C-4–C-6), 61.79, 61.97 (t, OCH<sub>2</sub>), 64.47 (s, C-8), 66.52, 67.13 (t, OCH<sub>2</sub>), 68.03, 68.64, 69.63, 71.55, 71.89, 73.14, 73.59, 75.26 (d, C-11–C-14, C-19–C-22), 83.10 (d, C-10), 100.65 (d, C-18), 128.56, 128.60, 128.96 (d, CH arom.), 136.46 (s, C arom.), 167.63, 169.90, 170.35, 170.53, 170.91, 171.23, 171.32, 171.55, 173.80, 174.00 (s, CO); HRMS (ESI) calcd for C<sub>47</sub>H<sub>64</sub>N<sub>2</sub>O<sub>23</sub>Na [M+Na<sup>+</sup>]: 1047.3792, found: 1047.3805; Anal. calcd for C<sub>47</sub>H<sub>64</sub>N<sub>2</sub>O<sub>23</sub>: C, 55.07; H, 6.29; N, 2.73; found: C, 54.64; H, 6.12; N, 2.76

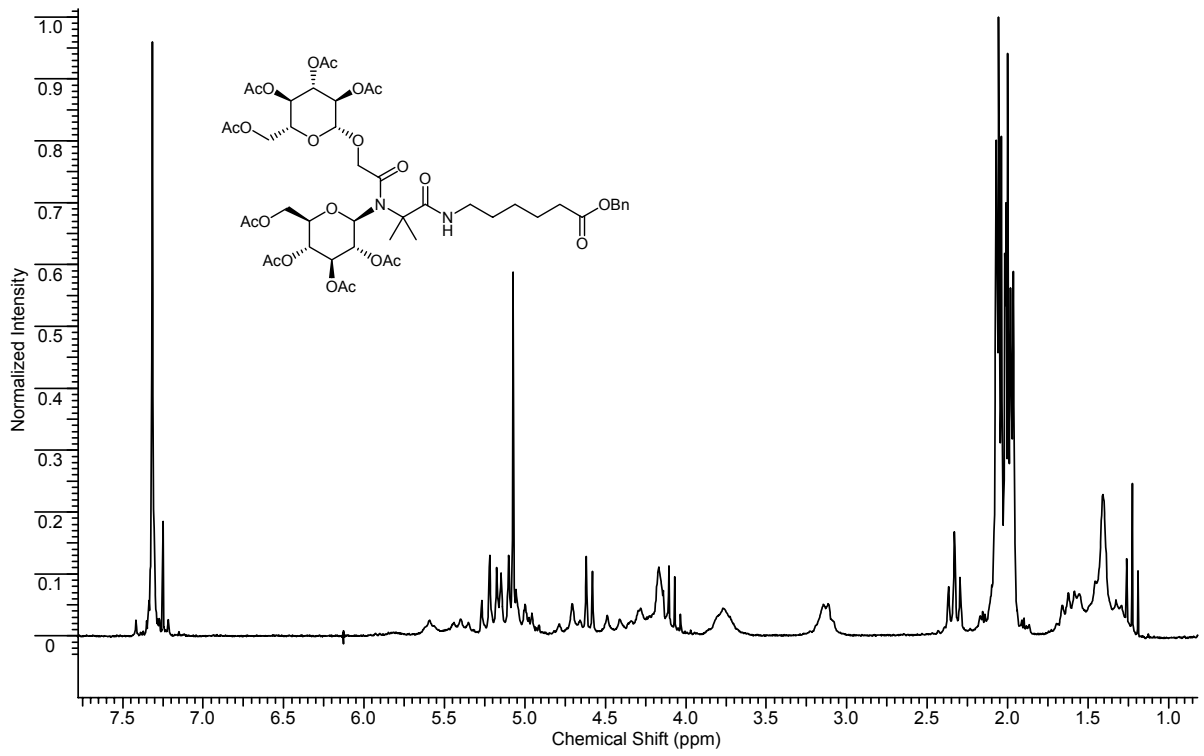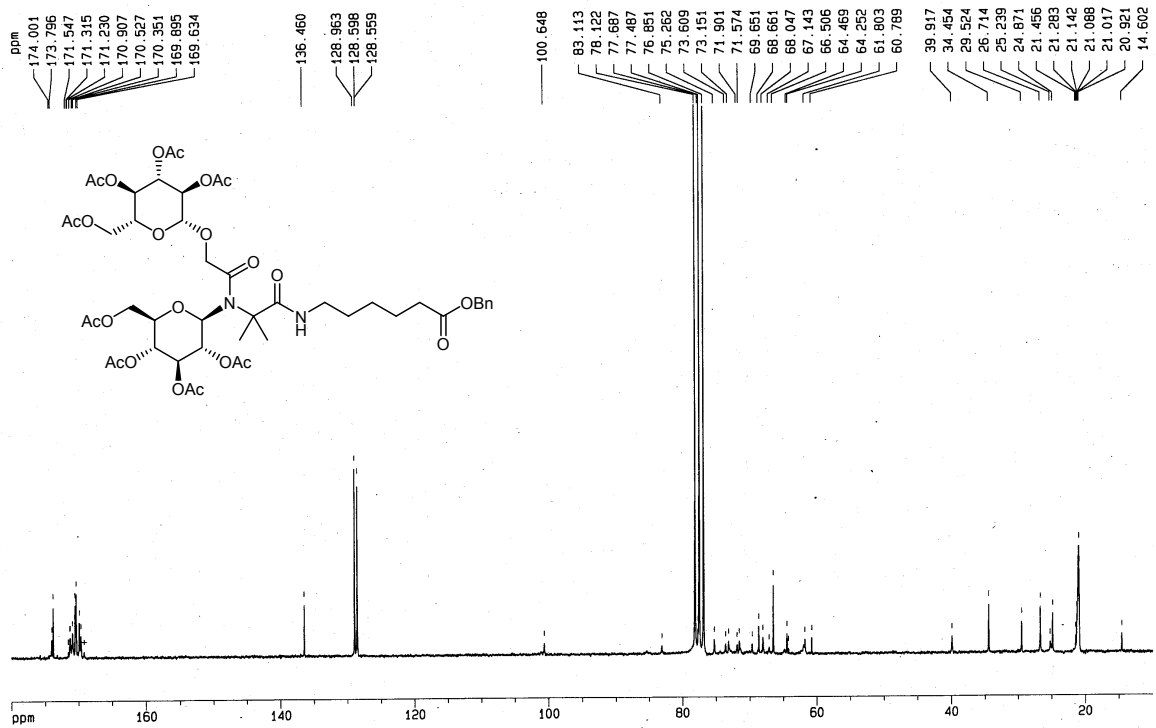

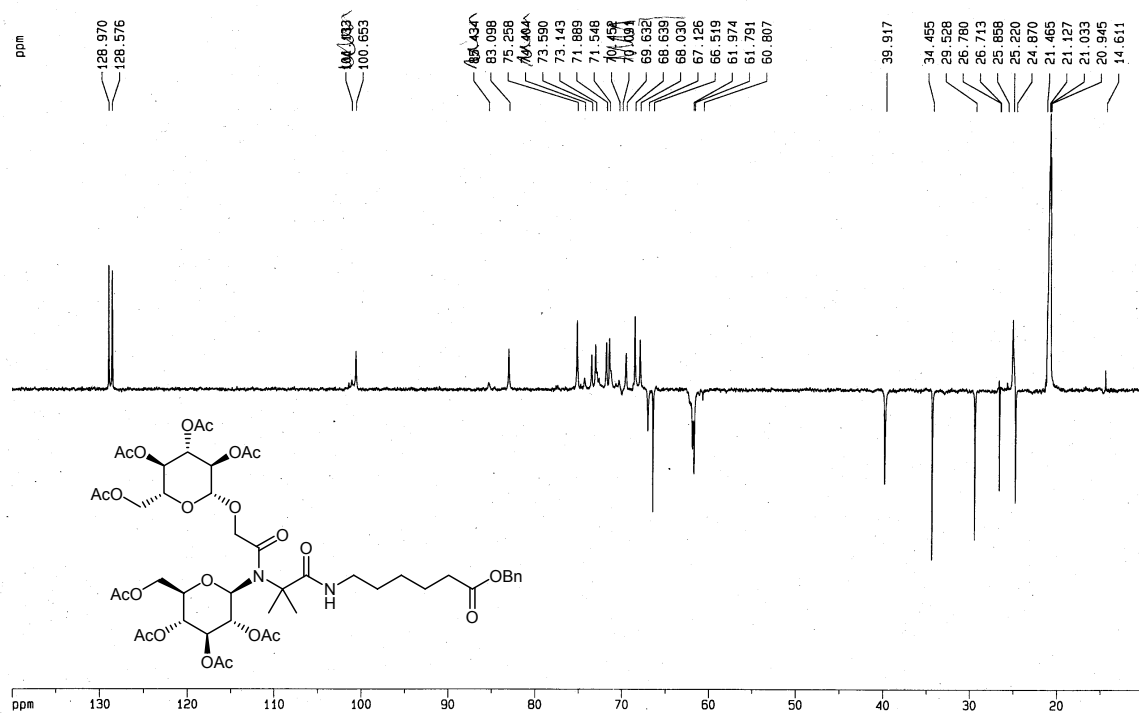

**3,4,6-Tri-*O*-acetyl-2-(acetylamino)-*N*-(2-{[6-(benzyloxy)-6-oxohexyl]amino}-1,1-dimethyl-2-oxoethyl)-2-deoxy-*N*-({[3,4,6-tri-*O*-acetyl-2-(acetylamino)-2-deoxy- $\beta$ -D-glucopyranosyl]oxy}acetyl)- $\beta$ -D-glucopyranosylamine (18)**

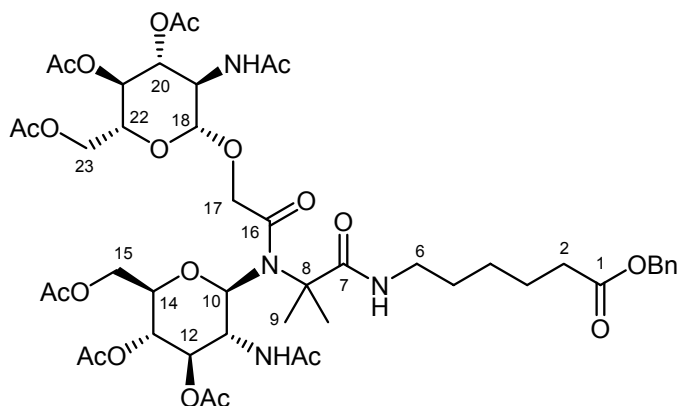

**<sup>1</sup>H-NMR** (500 MHz, CDCl<sub>3</sub>):  $\delta$  [ppm] = 1.20–1.84 (m, 12H), 1.95, 2.01, 2.02, 2.03, 2.06, 2.09, 2.10 (s, 3H), 2.38 (t,  $J$  = 7.4 Hz, 2H), 3.06–3.24 (m, 2H), 3.55–5.37 (m, 18H), 5.93–6.07 (m, 1H), 6.60–6.74 (m, 1H), 6.90–7.05 (m, 1H), 7.36 (s, 5H); **<sup>13</sup>C-NMR** (125 MHz, CDCl<sub>3</sub>):  $\delta$  [ppm] = 20.50, 20.54, 20.60, 20.65, 20.69, 20.73 (q, CH<sub>3</sub>(OAc)), 23.15, 23.20 (q, CH<sub>3</sub>(NHAc)), 24.43, 26.25 (t, CH<sub>2</sub>), 26.82 (q, C-9), 28.95, 34.04, 39.61 (t, CH<sub>2</sub>), 51.74, 53.58 (d, C-11, C-19), 61.49, 61.71, 62.00, 66.11 (t, OCH<sub>2</sub>), 64.24 (s, C-8), 67.50, 67.96, 68.43, 71.19, 72.96, 74.64 (d, C-11–C-14, C-19–C-22), 83.98 (d, C-10), 98.38 (d, C-18), 128.11, 128.52 (d, CH arom.), 135.99 (s, C arom.), 169.19, 169.37, 170.49, 170.79, 170.92, 171.23, 171.27, 171.86, 173.16, 173.44, 173.94 (s, CO); **HRMS (ESI)** calcd for C<sub>47</sub>H<sub>66</sub>N<sub>4</sub>O<sub>21</sub>Na [M+Na<sup>+</sup>]: 1045.4112, found: 1045.4114

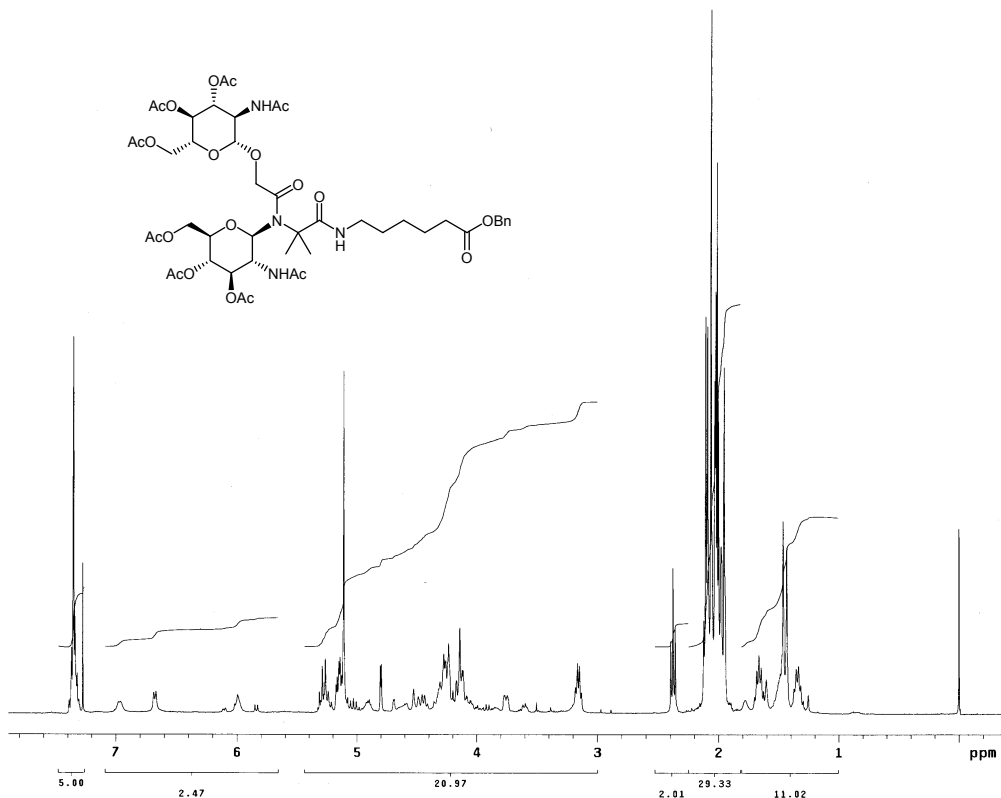

1H Standard-Parameter  
 Wed Jul 21 19:06 2004  
 exp7 std1h

SAMPLE  
 date Jul 21 2004  
 solvent CDCl3  
 file /export/home/~nwc/dos/dos247.1H-  
 fig

ACQUISITION  
 instrum m400  
 probe asw5  
 seqfil s2pu1  
 sffrq 399.937  
 tn H1  
 at 2.562  
 np 65536  
 sw 12787.7  
 bs 8  
 tpwr 58  
 pw 2.8  
 d1 1.000  
 d2 0  
 tof 828.3  
 nt 40  
 ct 49  
 alock n  
 gain not used

DEC. & VT  
 il n  
 in nw  
 dp y

PROCESSING  
 lb 0.40  
 wtfile ft  
 proc e5536  
 fn

DISPLAY  
 sp -139.3  
 wp 3295.4  
 vs 160  
 sc 85  
 wc 225  
 hzmm 14.65  
 is 682.01  
 rfi 3541.2  
 th 0  
 rfp 4.1  
 ins 5.000  
 rp 5.4  
 lp -199.0  
 nm ph

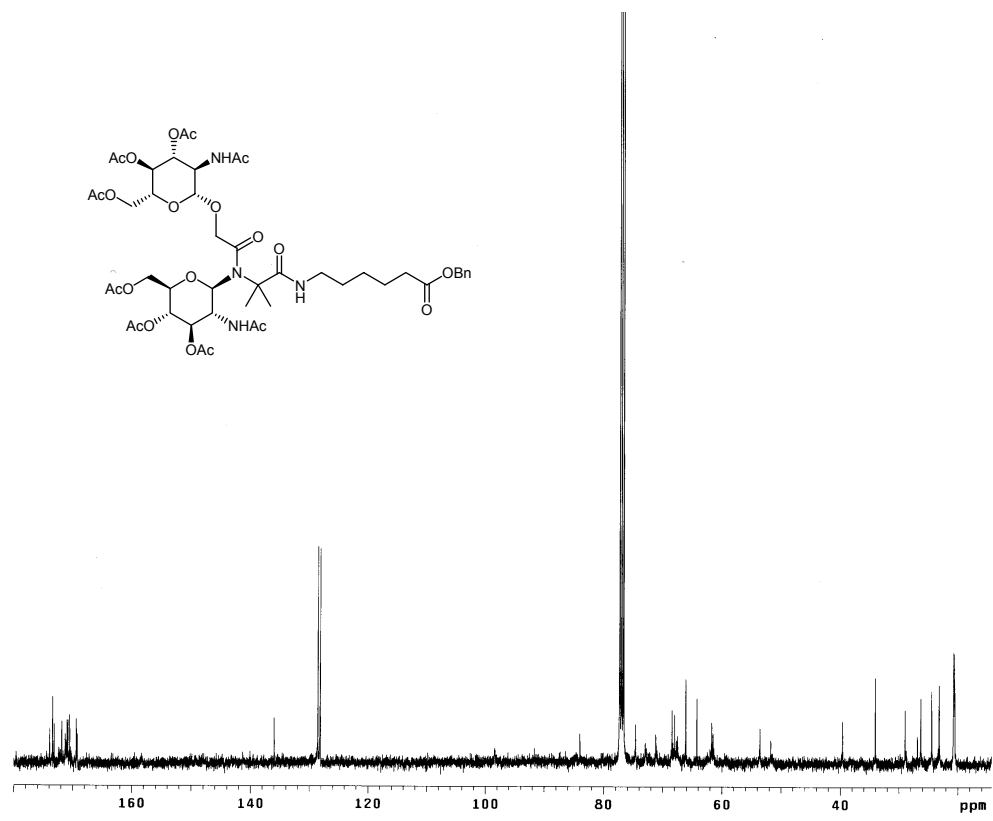

dos247.13C  
 Wed Jul 21 19:11 2004  
 exp7 std13c

SAMPLE  
 date Jul 21 2004  
 solvent CDCl3  
 file /export/home/~nwc/dos/dos247.13C-  
 fig

ACQUISITION  
 instrum m400  
 probe asw5  
 seqfil s2pu1  
 sffrq 100.574  
 tn C13  
 at 1.311  
 np 67216  
 sw 25641.0  
 bs 16  
 tpwr 61  
 pw 4.0  
 d1 1.689  
 d2 0  
 tof 1327.2  
 nt 6080  
 ct 6080  
 alock not used  
 gain not used

DEC. & VT  
 il n  
 in n  
 dp y

PROCESSING  
 lb 1.00  
 wtfile ft  
 proc e5536  
 fn

DISPLAY  
 sp 1443.7  
 wp 16658.4  
 vs 489  
 sc 65  
 wc 225  
 hzmm 74.04  
 rfi 3742.0  
 rfp 7743.4  
 th 3.4  
 rp 33.7  
 lp -300.8  
 nm ph

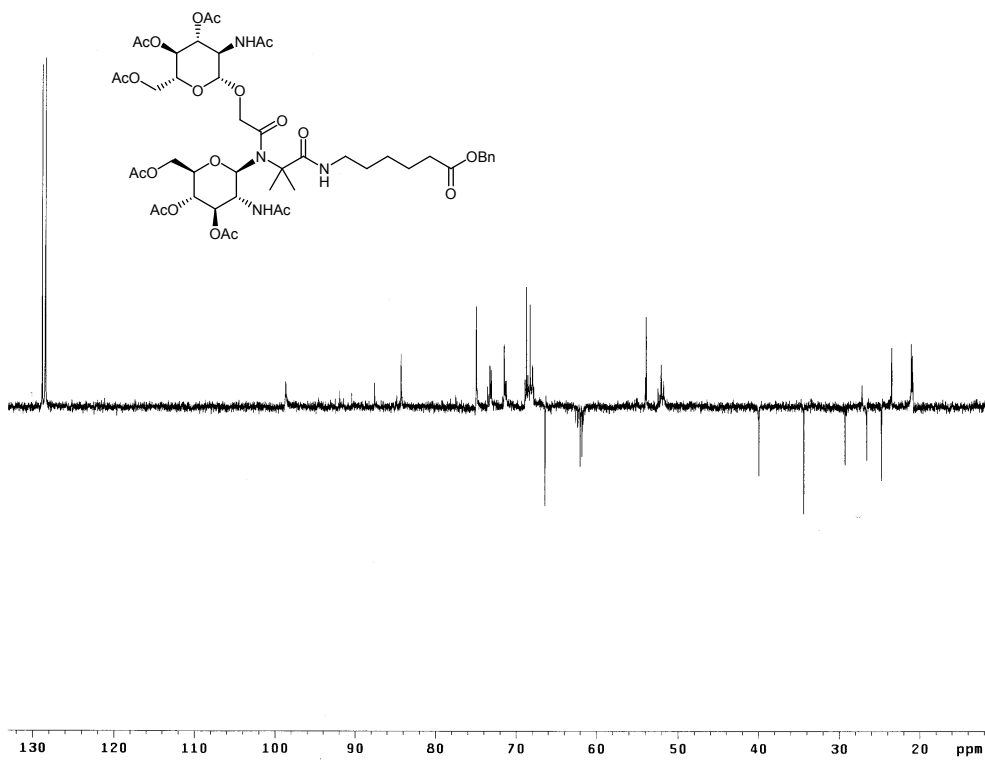

```

13C Standard-Parameter
Thu Jul 22 00:11 2004
exp7 dept
SAMPLE ip
date Jul 21 2004 nm
solvent CDCl3
file /export/home/~
nwc/dos/dos247.dep-
1.fid
ACQUISITION
instrum m400
probe agv5
dept
segfil
sfrq 100.574
tn
at 1.311
np 67216
sw 25641.9
bs 16
ss 8
tpwr 61
pw 14.7
d1 2.000
d2 0
tof 1327.2
nt 8000
ct 8000
alock n
gain not used
SPECIAL
j 140.0
mult 1.5
FLAGS
il n
in n
dp DEC. & VT y
dn H1
dfrq 399.936
homo n
dpwr 40
dof 0
dm nny
dmm ccw
dmf 9350
pplv1 60
pp 11.5
j 140.0
PROCESSING
lb 1.00
wtfile ft
proc fn 65536
wexp procplot
DISPLAY
sp 1165.7
wp 12211.3
vs 80
sc 65
wc 225
hzmm 54.27
rfl 1970.6
rfd 0
th 5.2
rp -58.8

```

**3,4-Di-*O*-acetyl-*N*-(2-{[6-(benzyloxy)-6-oxohexyl]amino}-1,1-dimethyl-2-oxoethyl)-2,6-dideoxy-*N*-[(3,4,6-tri-*O*-acetyl-2-deoxy-2-[(trifluoroacetyl)amino]- $\beta$ -D-glucopyranosyl]-oxy)acetyl]-2,6-bis[(trifluoroacetyl)amino]- $\beta$ -D-glucopyranosylamine (19)**

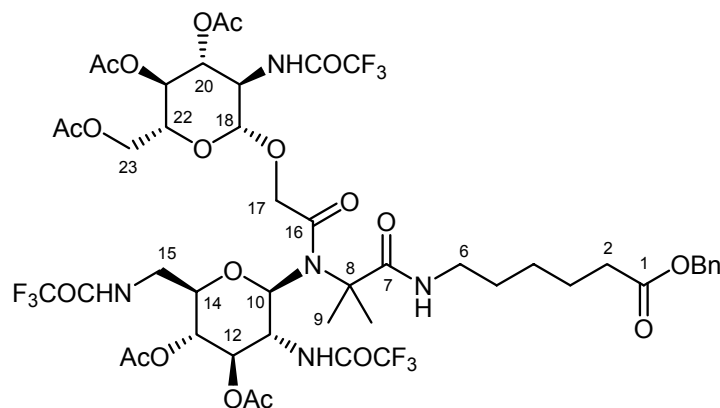

**<sup>1</sup>H-NMR** (500 MHz, CDCl<sub>3</sub>):  $\delta$  [ppm] = 1.30–1.39 (m, 2H), 1.40–1.74 (m, 8H), 1.77–1.89 (m, 2H), 2.03, 2.03, 2.06, 2.10, 2.11 (s, 3H), 2.38 (t,  $J$  = 7.2 Hz, 2H), 3.12–3.36 (m, 2H), 3.72–3.86 (m, 4H), 4.05–4.31 (m, 4H) 4.44–4.66 (m, 2H), 4.76 (d,  $J$  = 8.2 Hz, 1H), 4.92–5.05 (m, 2H), 5.10–5.22 (m, 4H), 5.30 (bt,  $J$  = 9.1 Hz, 1H), 5.82 (bs, 1H), 7.22–7.32 (m, 5H), 7.70–8.18 (m, 3H); **<sup>13</sup>C-NMR** (125 MHz, CDCl<sub>3</sub>):  $\delta$  [ppm] = 20.30, 20.40, 20.49, 20.53, 20.61 (q, CH<sub>3(Ac)</sub>), 24.34 (t, C-3), 25.20, 25.44 (q, C-9), 26.09, 28.67, 34.04, 39.57, 39.97 (t, C-2, C-4–C-6, C-15), 53.43, 54.47 (d, C-11, C-19), 61.70 (t, OCH<sub>2</sub>), 64.40 (s, C-8), 66.29, 67.88 (t, OCH<sub>2</sub>), 68.03, 69.03, 72.40, 72.69, 74.69, 77.20 (d, C-12–C-14, C-20–C-22), 83.14 (d, C-10), 99.84 (d, C-18), 115.42 (m, CF<sub>3</sub>), 128.05, 128.22, 128.58 (d, CH arom.), 135.98 (s, C arom.), 158.06 (m, C(O)CF<sub>3</sub>), 169.32, 170.78, 170.80, 170.81, 170.86, 171.00, 173.97, 174.00 (s, CO); **HRMS (ESI)** calcd for C<sub>47</sub>H<sub>58</sub>F<sub>9</sub>N<sub>5</sub>O<sub>20</sub>Na [M+Na<sup>+</sup>]: 1206.3424, found: 1206.3421



3,4-Di-*O*-acetyl-*N*-(2-{[6-(benzyloxy)-6-oxohexyl]amino}-1,1-dimethyl-2-oxoethyl)-2,6-dideoxy-*N*-[({3,4-di-*O*-acetyl-2,6-dideoxy-2,6-bis[(trifluoroacetyl)amino]- $\beta$ -D-glucopyranosyl}oxy)acetyl]-2,6-bis[(trifluoroacetyl)amino]- $\beta$ -D-glucopyranosylamine (20)

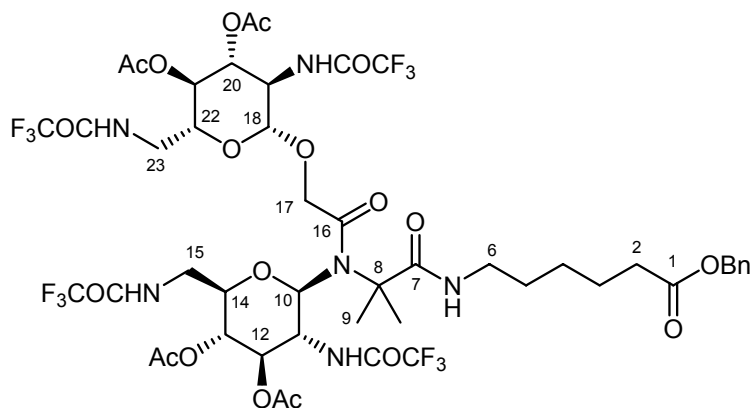

**<sup>1</sup>H-NMR** (500 MHz, CDCl<sub>3</sub>):  $\delta$  [ppm] = 1.20–1.38 (m, 3H), 1.38–1.55 (m, 6H), 1.55–1.70 (m, 3H), 1.81 (s, 2H), 2.02, 2.04, 2.10, 2.12 (s, 3H), 2.38 (t,  $J$  = 7.2 Hz, 2H), 3.04–3.39 (m, 4H), 3.60–3.92 (m, 4H), 4.02–4.16 (m, 1H), 4.37–4.48 (d,  $J$  = 15.6 Hz, 1H), 4.61–4.71 (m, 1H), 4.80–4.93 (m, 1H), 4.93–5.05 (m, 2H), 5.10 (s, 2H), 5.23 (t,  $J$  = 9.8 Hz, 1H), 5.32 (t,  $J$  = 9.4 Hz, 1H), 5.90 (bs, 1H), 7.35 (s, 5H), 7.72–7.96 (m, 3H), 8.44 (bs, 1H); **<sup>13</sup>C-NMR** (125 MHz, CDCl<sub>3</sub>):  $\delta$  [ppm] = 20.42, 20.75, 20.86, 20.91 (q, CH<sub>3(Ac)</sub>), 24.67 (t, C-3), 25.20, 25.46 (q, C-9), 26.44, 28.98, 34.40, 39.90, 40.21, 40.95 (t, C-2, C-4–C-6, C-15, C-23), 53.26, 54.92 (d, C-11, C-19), 64.92 (s, C-8), 66.72, 68.41 (t, OCH<sub>2</sub>), 70.06, 70.07, 72.35, 73.19, 73.35, 74.40 (d, C-12–C-14, C-20–C-22), 83.37 (d, C-10), 99.61 (d, C-18), 116.23 (m, CF<sub>3</sub>), 128.35, 128.64, 128.99 (d, CH arom.), 136.30 (s, C arom.), 159.02 (m, C(O)CF<sub>3</sub>), 170.33, 170.41, 170.98, 171.16, 172.78, 174.52, 174.81 (s, CO); **HRMS (ESI)** calcd for C<sub>47</sub>H<sub>56</sub>F<sub>12</sub>N<sub>6</sub>O<sub>19</sub>Na [M+Na<sup>+</sup>]: 1259.3301, found: 1259.3264

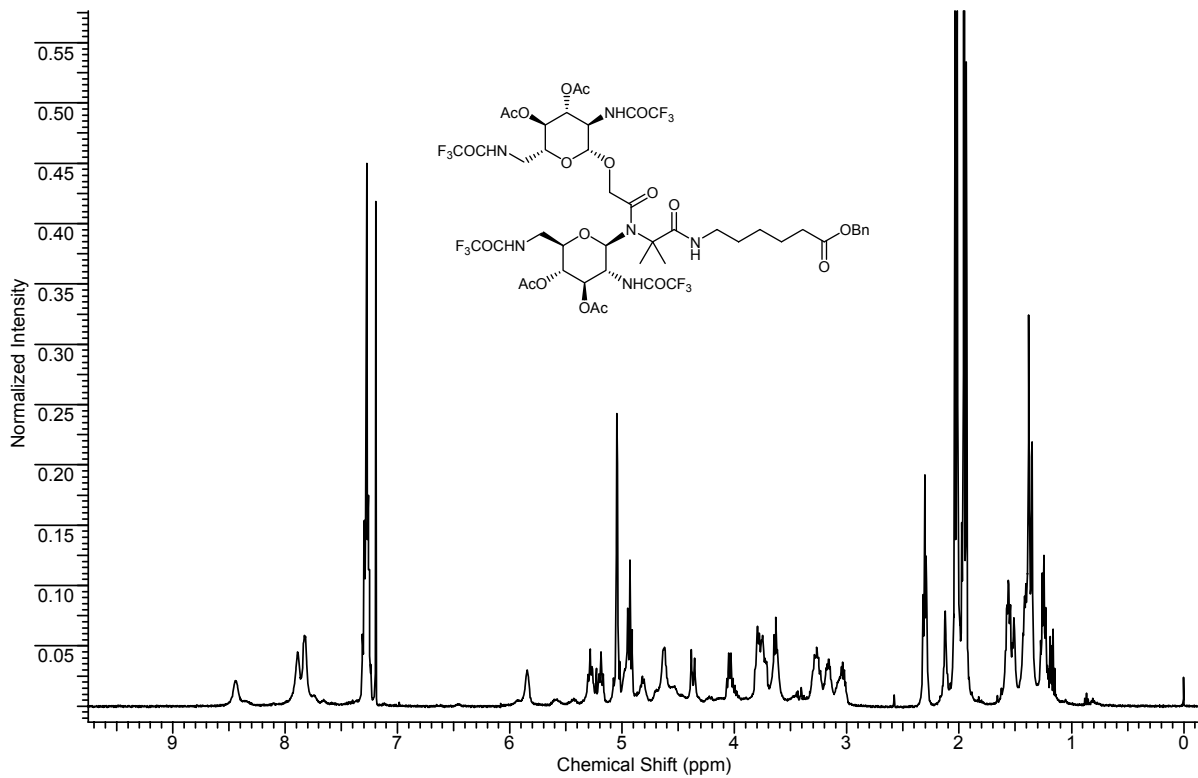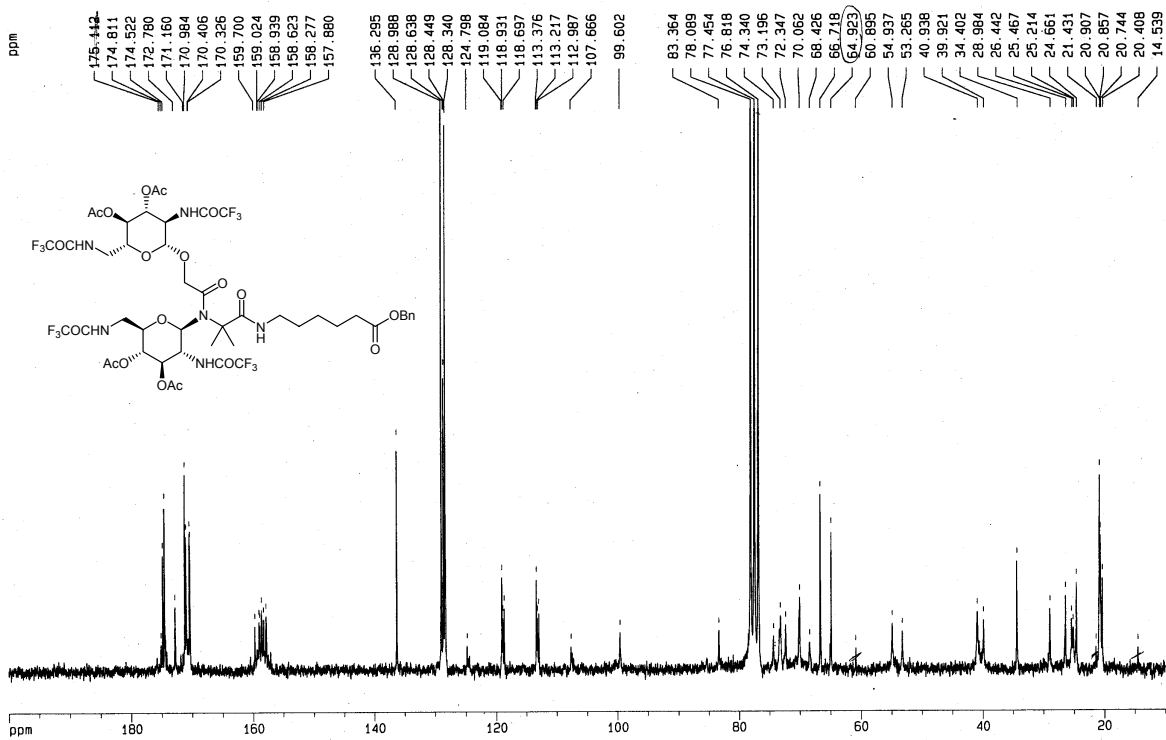

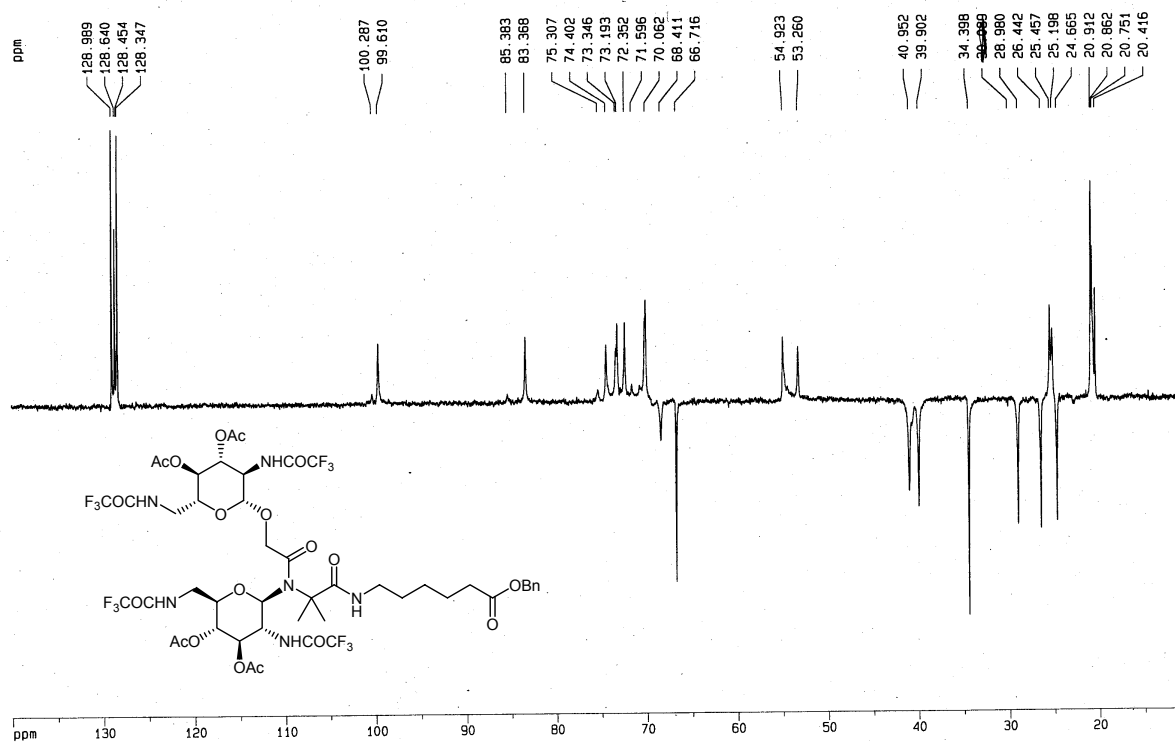

2,3,4,6-Tetra-*O*-acetyl-*N*-((1*R*,5*S*)-2-{{6-(benzyloxy)-6-oxohexyl}amino}-2-oxo-1-{{(2,3,4,6-tetra-*O*-acetyl- $\beta$ -D-glucopyranosyl)oxy}methyl}ethyl)-*N*-{{(2,3,4,6-tetra-*O*-acetyl- $\beta$ -D-glucopyranosyl)oxy}acetyl}- $\beta$ -D-glucopyranosylamine (21)

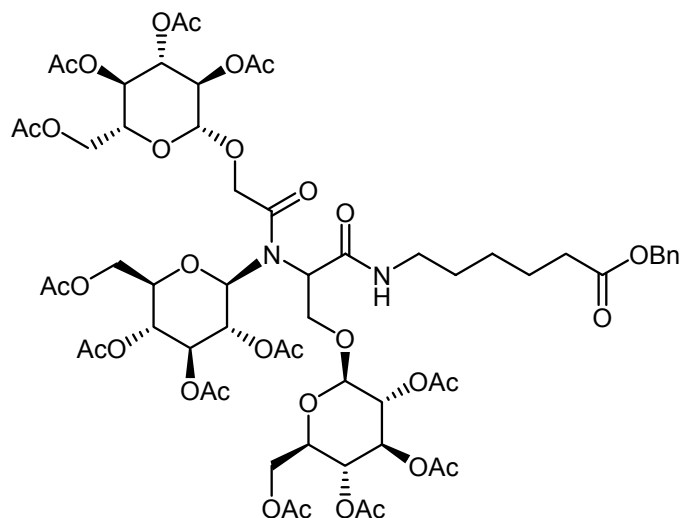

**<sup>1</sup>H-NMR** (200 MHz, CDCl<sub>3</sub>): isomeric mixture:  $\delta$  [ppm] = 1.19–1.79 (m, 6H), 1.92–2.19 (m, 36H), 2.48–2.31 (m, 2H), 3.04–3.33 (m, 2H), 3.60–5.41 (m, 28H), 6.49–6.66 (m, 1H), 7.37 (s, 5H); **<sup>13</sup>C-NMR** (50 MHz, CDCl<sub>3</sub>): signal ranges:  $\delta$  [ppm] = 20.98–21.43 (q, CH<sub>3(Ac)</sub>), 24.90, 26.83, 29.53, 34.50, 39.90, 46.74, 62.07, 62.42, 66.48 (t, CH<sub>2</sub>, OCH<sub>2</sub>), 68.01–101.15 (d, CH sugar), 128.57, 128.93, 128.96 (d, CH arom.), 136.55 (s, C arom.), 169.60–173.77 (s, CO); **HRMS (ESI)** calcd for C<sub>60</sub>H<sub>80</sub>N<sub>2</sub>O<sub>33</sub>Na [M+Na<sup>+</sup>]: 1379.4536, found: 1379.4491

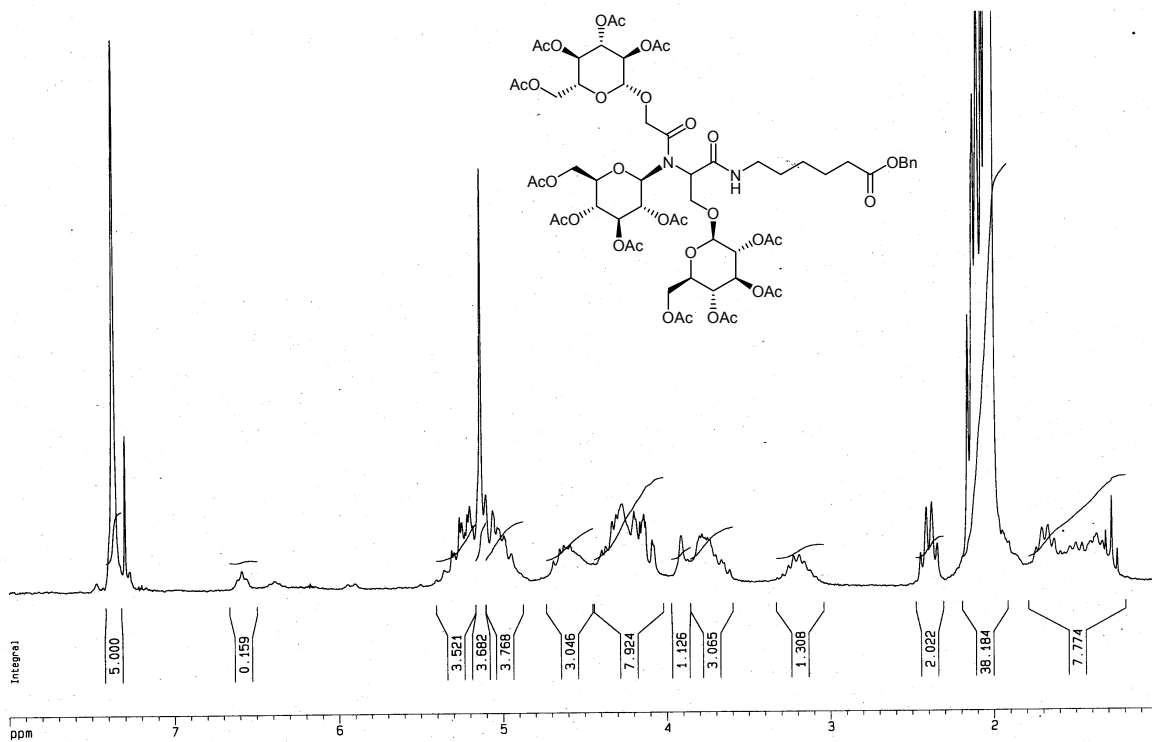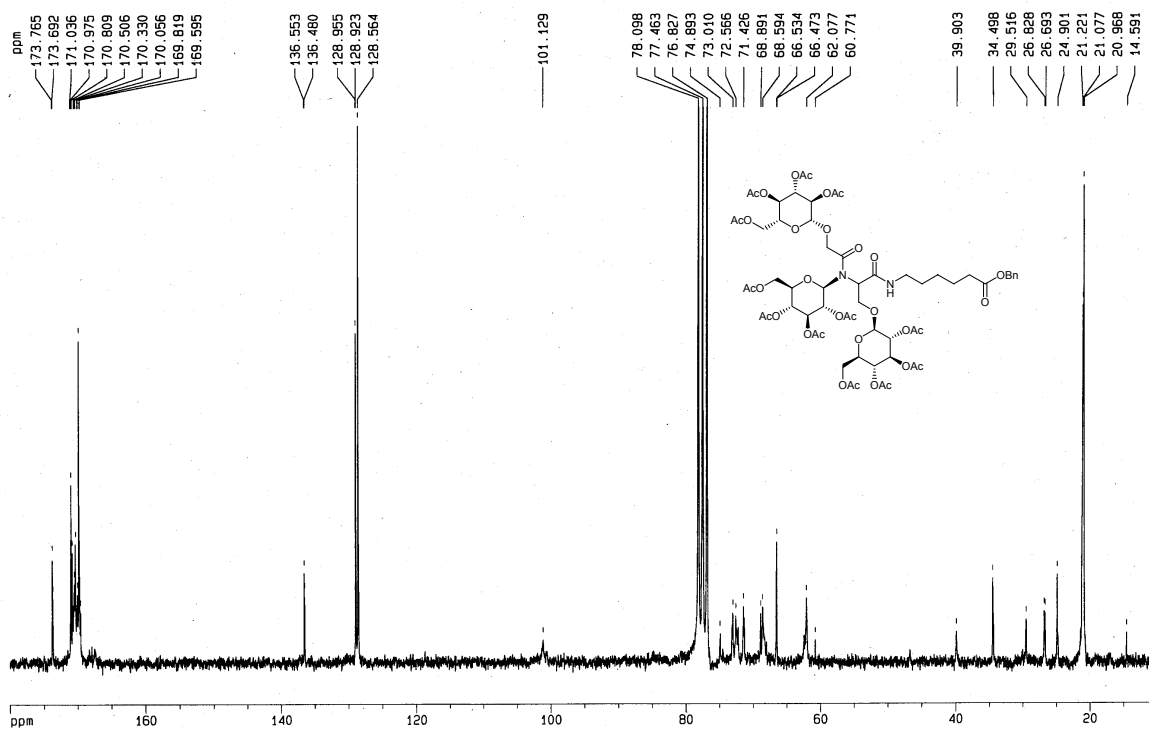

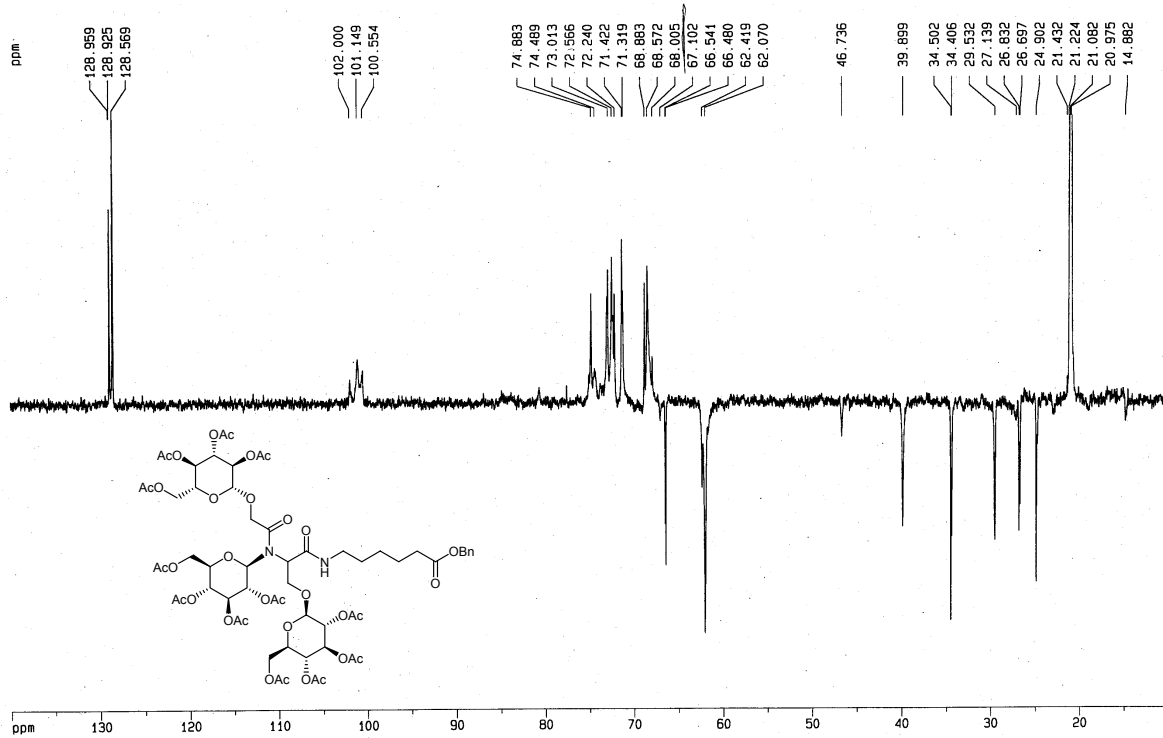

3,4-Di-*O*-acetyl-*N*-{(1*R*,5)-2-{{6-(benzyloxy)-6-oxohexyl}amino}-2-oxo-1-[(3,4,6-tri-*O*-acetyl-2-deoxy-2-[(trifluoroacetyl)amino]-β-D-glucopyranosyl}oxy)methyl]ethyl}-2,6-dideoxy-*N*-[(3,4,6-tri-*O*-acetyl-2-deoxy-2-[(trifluoroacetyl)amino]-β-D-glucopyranosyl]-oxy)acetyl]-2,6-bis[(trifluoroacetyl)amino]-β-D-glucopyranosylamine (22)

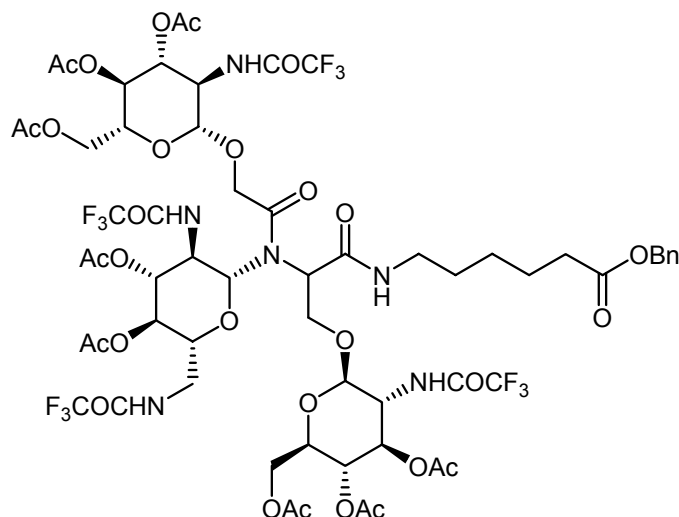

**<sup>1</sup>H-NMR** (400 MHz, CDCl<sub>3</sub>): isomeric mixture: δ [ppm] = 1.27–1.77 (m, 6H), 1.93–2.16 (m, 24H), 2.22–2.49 (m, 4H), 3.12–5.47 (m, 30H), 5.50–7.00 (m, 1H), 7.30–7.43 (m, 5H), 7.60–8.80 (m, 2H); **<sup>13</sup>C-NMR** (100 MHz, CDCl<sub>3</sub>): signal ranges: δ [ppm] = 20.25–20.74 (q, CH<sub>3(Ac)</sub>), 24.37, 26.20, 28.60, 34.03, 39.31–40.04 (t, CH<sub>2</sub>, NCH<sub>2</sub>), 54.18–54.60 (d, NCH), 61.20–62.03, 66.29 (t, OCH<sub>2</sub>), 67.75–101.81 (d, CH sugar), 116.08 (m, CF<sub>3</sub>), 127.99, 128.10, 128.54 (d, CH arom.), 135.95 (s, C arom.), 158.03 (m, C(O)CF<sub>3</sub>), 167.92–171.30 (s, CO); **HRMS (ESI)** calcd for C<sub>60</sub>H<sub>72</sub>F<sub>12</sub>N<sub>6</sub>O<sub>29</sub>Na [M+Na<sup>+</sup>]: 1591.4044, found: 1591.4009

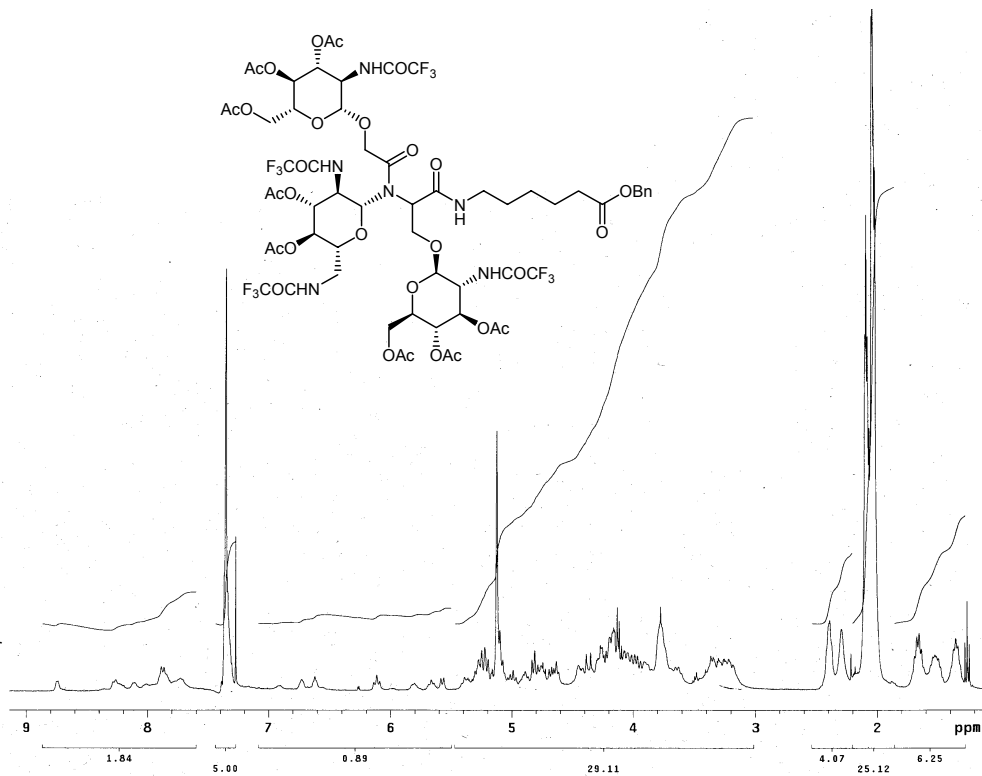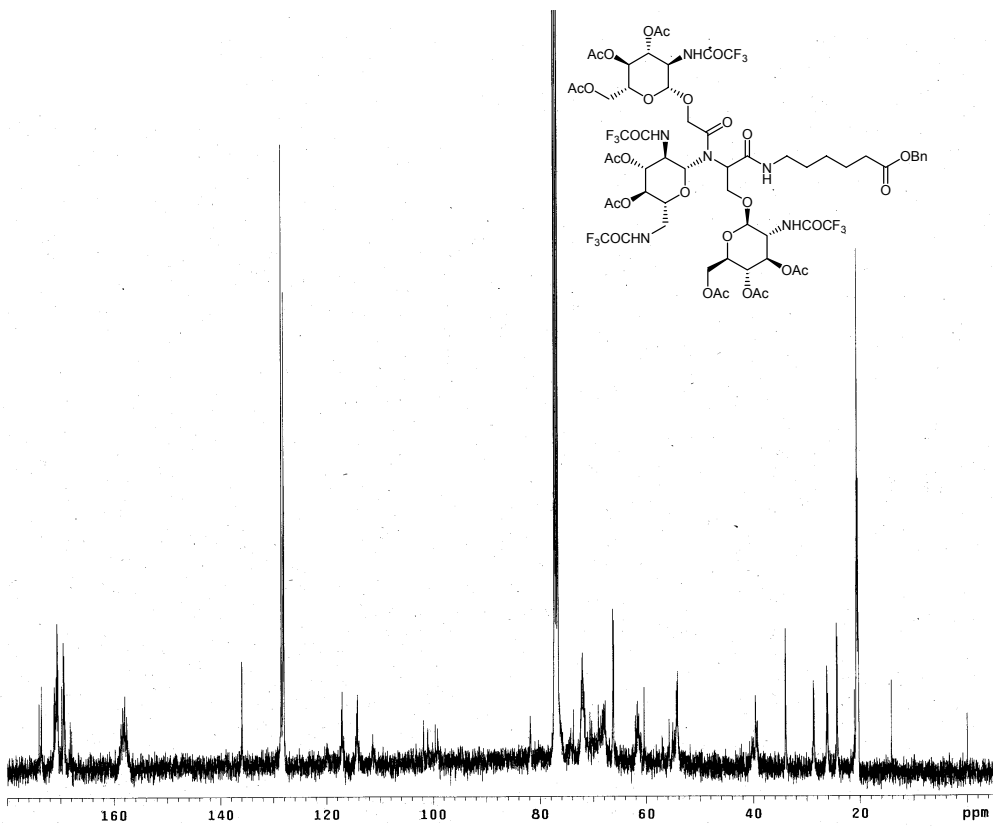

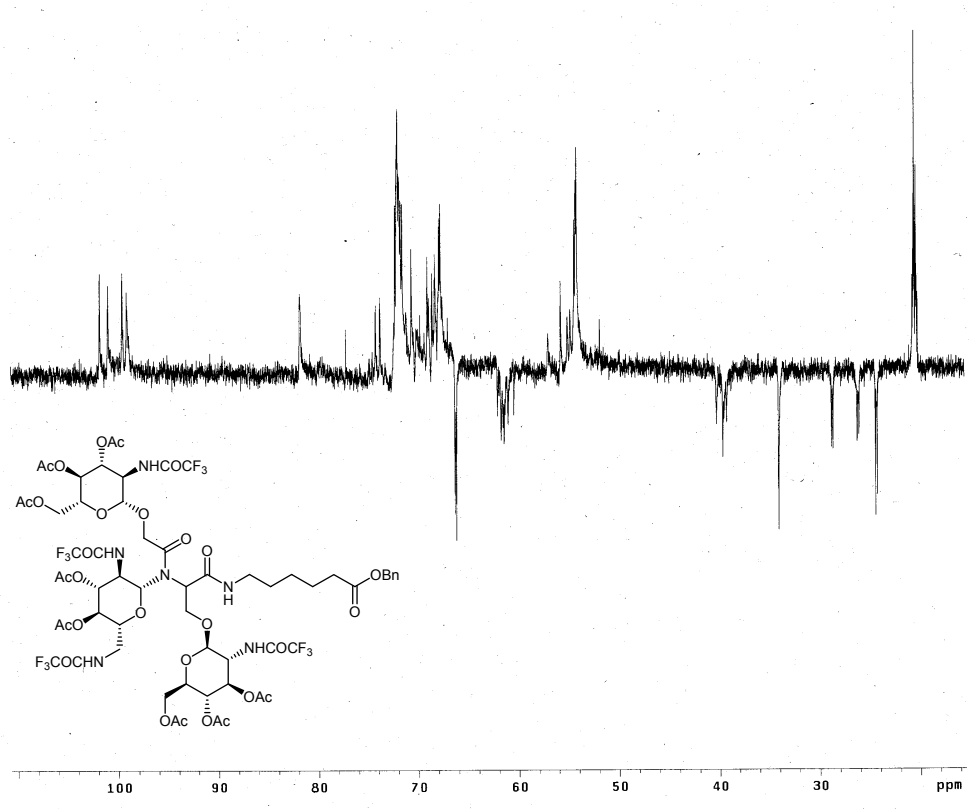

```

dos200.13C.cdc13
dept135
Sun Aug 15 14:24 2004

exp2 dept

SAMPLE
date Aug 15 2004
solvent CDCl3
file exp
ACQUISITION
instrum m400
probe agw5
seqfil dept
sfrq 100.574
tn 013
at 1.311
np 67216
sw 25641.0
ss 8
tpwr 61
pw 14.7
d1 2.000
d2 0
tof 1327.2
nt 20000
ct 20000
alock n
gain not used
SPECIAL
j 140.0
mult 1.5
FLAGS
il n
in n
dp y
DEC. & VT
dn H1
dfrq 399.836
homo n
dpwr 40
dof 0
dm nny
dmm ccw
dwt 9350
pp1v1 60
pp 11.5
j 140.0
PROCESSING
lb 1.00
wtfile ft
proc fn
fn 65536
wexp procp1ot
DISPLAY
sp 1555.9
wp 9578.9
vs 232
sc 65
wc 225
hzmm 42.57
rfl 1998.3
rfp 0
th 3.8
rp -89.7
lp -247.2
nm no ph

```

3,4-Di-*O*-acetyl-*N*-{(1*R*,5)-2-[[6-(benzyloxy)-6-oxohexyl]amino]-1-[(3,4-di-*O*-acetyl-2,6-dideoxy-2,6-bis[(trifluoroacetyl)amino]- $\beta$ -D-glucopyranosyl]oxy)methyl]-2-oxoethyl}-2,6-dideoxy-*N*-[(3,4,6-tri-*O*-acetyl-2-deoxy-2-[(trifluoroacetyl)amino]- $\beta$ -D-glucopyranosyl]oxy)acetyl]-2,6-bis[(trifluoroacetyl)amino]- $\beta$ -D-glucopyranosylamine (23)

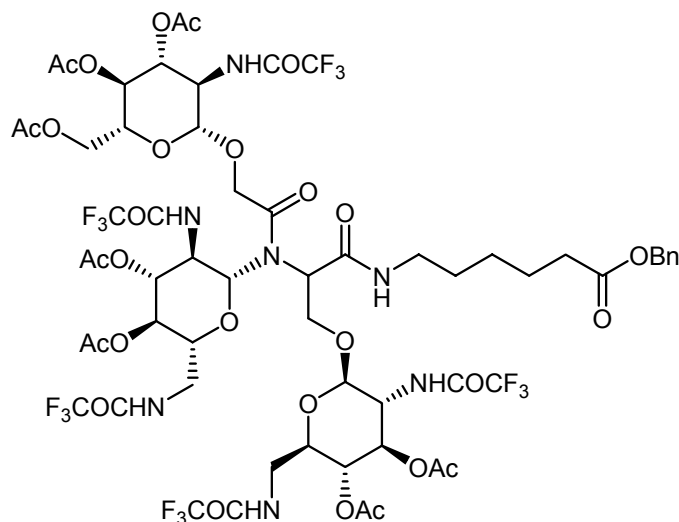

**<sup>1</sup>H-NMR** (400 MHz, CDCl<sub>3</sub>): isomeric mixture:  $\delta$  [ppm] = 1.26–1.40 (m, 2H), 1.44–1.57 (m, 2H), 1.59–1.72 (m, 2H), 1.90–2.10 (m, 21H, CH<sub>3(Ac)</sub>), 2.34–2.43 (m, 2H), 3.02–5.43 (m, 31H), 7.28–7.37 (m, 5H, CH arom.); **<sup>13</sup>C-NMR** (100 MHz, CDCl<sub>3</sub>): signal ranges:  $\delta$  [ppm] = 20.03–20.53 (q, CH<sub>3(Ac)</sub>), 25.32, 27.09, 29.48, 34.58, 40.76, 41.01, 41.19 (t, CH<sub>2</sub>, NCH<sub>2</sub>), 51.68–55.45 (d, NCH), 62.63–66.91 (t, OCH<sub>2</sub>), 69.46–103.58 (d, CH sugar), 116.08 (m, CF<sub>3</sub>), 127.97, 128.00, 128.34 (d, CH arom.), 136.55 (s, C arom.), 158.03 (m, C(O)CF<sub>3</sub>), 169.54–174.03 (s, CO); **HRMS (ESI)** calcd for C<sub>60</sub>H<sub>70</sub>F<sub>15</sub>N<sub>7</sub>O<sub>28</sub>Na [M+Na<sup>+</sup>]: 1644.3922, found: 1644.3949

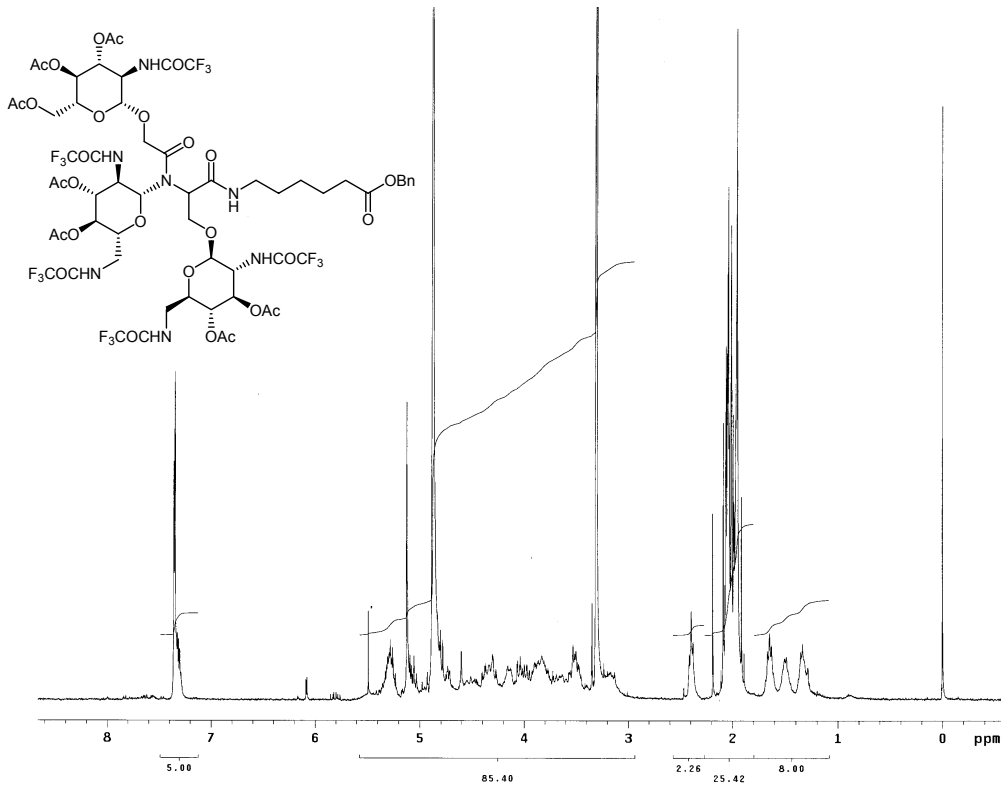

```

dos.250.1H.MeOD
Fri Aug 6 15:44 2004
exp7 std1h

SAMPLE
date Aug 6 2004
solvent CD3OD
file /export/home/~
nwc/dos/dos250.1H-
MeOD.fid

ACQUISITION
instrum m400
probe asw5
seqf1 82pu1
sfrq 399.939
tn H1
at 2.562
np 65536
sw 12787.7
bs 9
tpwr 58
pw 2.8
d1 1.000
d2 0
tof 828.3
nt 40
ct 40
alock n
gain not used

FLAGS
il n
in nw
dp DEC. & VT y

dn H1
dfrq 399.938
homo n
dpwr 30
dof 0
dm nnn
dmm C
dmf 200

PROCESSING
lb 0.40
wtfile ft
proc 65536

DISPLAY
sp -238.1
wp 3702.4
vs 2585
sc 65
wc 225
hzmm 18.46
is 323.73
rf1 3538.9
rfp 0
th 2.1
ins 5.000
rp 0.5
lp -178.7
nm ph
  
```

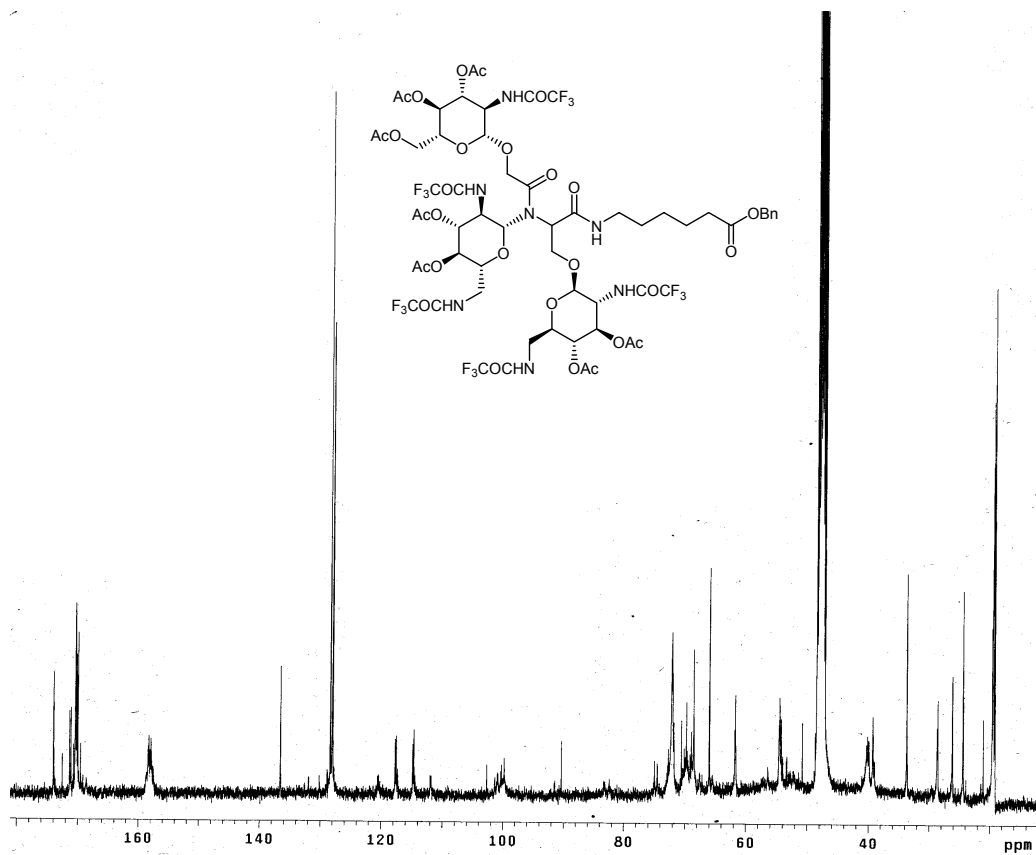

```

dos250.13C.MeOD
Fri Aug 6 18:03 2004
exp6 std13c

SAMPLE
date Aug 6 2004
solvent CD3OD
file exp

ACQUISITION
instrum m400
probe asw5
seqf1 82pu1
sfrq 100.575
tn C13
at 1.311
np 87216
sw 25641.8
bs 16
tpwr 61
pw 4.0
d1 1.689
d2 0
tof 1327.2
nt 45000
ct 45000
alock n
gain not used

FLAGS
il n
in nw
dp DEC. & VT y

dn H1
dfrq 399.938
homo n
dpwr 40
dof 0
dm yyy
dmm w
dmf 9350
pp 17.5

PROCESSING
lb 1.00
wtfile ft
proc 65536

DISPLAY
sp 1219.0
wp 17053.6
vs 4503
sc 65
wc 225
hzmm 75.79
rf1 1970.6
rfp 0
th 2.1
ins -164.1
rp -348.4
nm ph
  
```

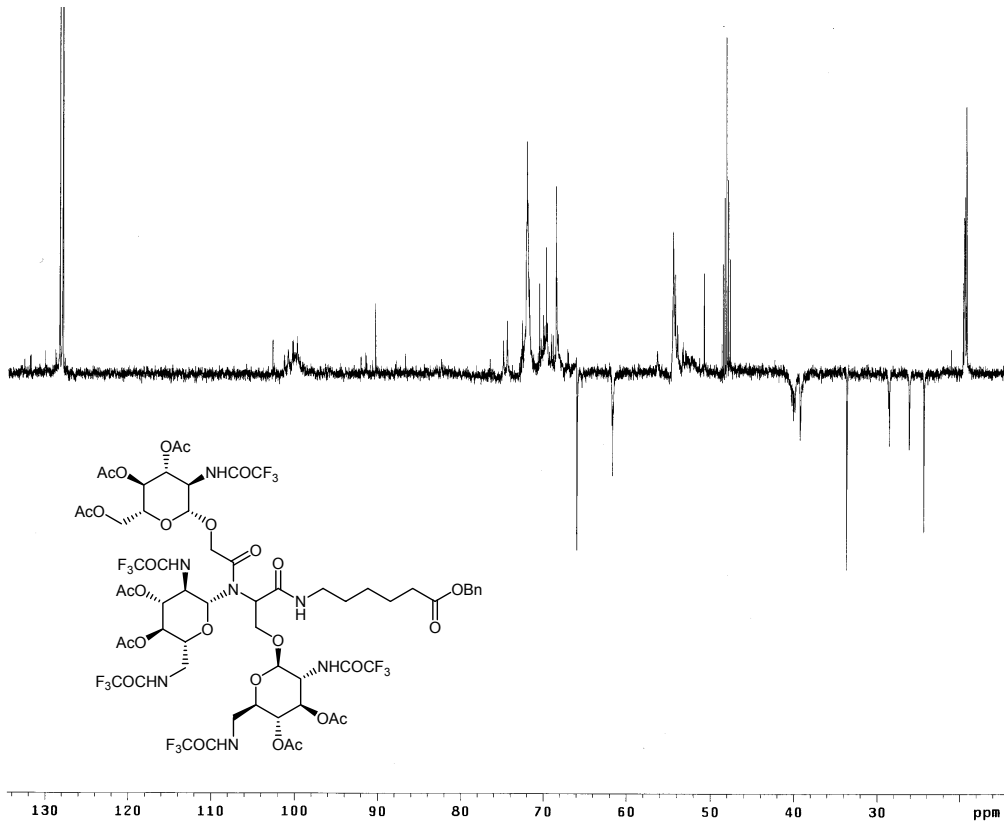

```

dos250.dept135.MeOD
Sun Aug  8 07:35 2004
exp7  dept
SAMPLE
date Aug  6 2004 1p
solvent CD3OD nm
file /export/home/~
nwc/dos/dos250.dept
135.MeOD.fid
ACQUISITION
instrum m400
probe asw5
seqfil dept
sfrq 100.575
tn 013
at 1.311
np 67216
sw 25641.0
bs 16
ss 8
tpwr 51
pw 14.7
d1 2.000
d2 0
tof 1327.2
nt 28000
ct 0
alock n
gain not used
SPECIAL
j mult 140.0
mult 1.5
FLAGS
i1 n
in n
dp y
DEC. & VT
dn H1
dfrq 399.938
homo n
dpwr 48
dcf 0
dm nny
dmm ccm
dmf 9350
pp1v1 60
pp 11.5
j 140.0
PROCESSING
lb 1.00
wtfile
proc ft
fn 65536
wexp procp1ot
DISPLAY
sp 1457.6
wp 12074.4
vs 145
sc 65
wc 225
hzmm 53.66
rf1 1970.6
rfp 0
tn 20.0
rp 25.4

```
